# Supplementary material for: Comparing non-targeted chemical persistence assessed using an unspiked OECD 309 test to field measurements
Source: Royal Society of Chemistry journal article supplement (doi:10.1039/c9em00595a), 2020-01-01
Supplement: c9em00595a2.xlsx [file c9em00595a2.xlsx]

## Sheet: Information
Supplementary Information for
Comparing non-targeted chemical persistence assessed using an unspiked OECD 309 test to field measurements
Zhe Li[1] and Michael S. McLachlan
Department of Environmental Science (ACES), Stockholm University,
S-10691 Stockholm, Sweden
[1] Corresponding author:
E-mail: zhe.li@aces.su.se. Phone: +46 8 674 7188.
This data file provides the peak areas of the effluent, inflowing water, and outflowing water in the 12 weekly samples for the chemicals for which half-lives in the field were reported.
The data have not been corrected for the difference in matrix effect between water and effluent.
The shaded cells under outflow show which weeks were used for the mass balance used to determine the half-life.
An area of 1.0E+03 indicates that the area was equal to or less than this value.

## Sheet: Data
			Sundet Effluent												Outflow												Inflow
Name	Formula	Molecular Weight	EFF-V22	EFF-V23	EFF-V24	EFF-V25	EFF-V26	EFF-V27	EFF-V28	EFF-V29	EFF-V30	EFF-V31	EFF-V32	EFF-V33	N-V22	N-V23	N-V24	N-V25	N-V26	N-V27	N-V28	N-V29	N-V30	N-V31	N-V32	N-V33	S-V22	S-V23	S-V24	S-V25	S-V26	S-V27	S-V28	S-V29	S-V30	S-V31	S-V32	S-V33
Acesulfame	C4 H5 N O4 S	162.993	3.29143e+06	4.24798e+06	1.87167e+06	1.11147e+06	906379	651332	467436	359061	364004	290505	302061	429324	1.01239e+06	1.22968e+06	1.01767e+06	882345	708934	781826	564292	415210	397349	390893	355224	308117	167115	72837	74606.6	70464.6	68643	60174	73642.1	73927	80857.3	88386.7	73713.2	89437.3
Amphetamine	C9 H13 N	135.105	378636	393914	190029	79879.8	51563.5	21136.4	15601.8	6209.23	5468.07	3951.26	5525.31	7080.69	31428.1	32529	22588.6	7780.92	6014.68	7620.34	6109.64	3877.37	5246.54	4391.79	3987.61	4170.56	3946.92	4657.95	2587.22	3948.02	3955.02	5645.82	3936.44	4425.19	2527.72	3350.37	4343.8	4026.18
Atenolol	C14 H22 N2 O3	266.163	265420	269634	269056	280232	307407	242783	288122	313107	322301	254687	249392	219362	5885.78	7073.66	8267.71	3913.67	3344.93	4440.31	3567.33	3081.66	2851.15	3039.49	3565.41	4130.36	2919.9	2792.93	2675.06	2569.61	2776.07	2666.53	2842.48	2670.49	2717.83	2738.07	2513.22	2771.85
Benzophenone	C13 H10 O	182.073	39990	44313.5	43444.5	80869.8	104444	83507.1	60919.8	44140.1	31313.2	36483.4	37162.9	69523	265031	233342	66467.8	47103.4	128744	35145.1	66973.5	194348	51162.2	49287	74842.7	69012	28986.9	31302.8	21722.7	28806.9	28401.2	108288	101261	35105.8	28488	60468.4	23864.2	22576.5
Benzotriazole	C6 H5 N3	119.048	879708	884153	1.03221e+06	897368	816550	542997	960047	825706	817572	708072	937822	727874	258592	295398	260759	258996	262305	257159	256225	235688	236962	232400	224656	208644	46732.6	12552.4	10622.5	9185.94	9118.97	9354.83	8147.64	8483.5	8346.76	8245.17	9700.93	9969.29
Benzoylecgonine	C16 H19 N O4	289.131	38950.8	67745.7	48938.7	36763.2	22949.6	19679.7	21756.9	19677.3	24483	20959.1	21817.2	31135.4	13081.3	11716.9	7874.27	3472.93	1917.17	1844.96	1000	1001.97	1123.15	1060.3	1021.66	1032.86	1142.85	1098.87	1014.77	1059.21	1087.47	1011.93	1091.12	1069.97	1049.15	1026.39	1000	1054.1
Choline	C5 H13 N O	103.1	63946.6	61209.8	65575.5	51897	54587.4	53416.8	59520.5	74197.2	53557.8	46404.1	40766.2	1.19281e+06	1.59848e+06	1.08199e+06	1.08469e+06	2.24518e+06	765845	940568	869223	662032	1.09905e+06	996600	920237	675212	571823	717216	823090	1.42568e+06	677557	429296	540357	588615	1.83283e+06	1.00902e+06	1.40572e+06	786319
Climbazole	C15 H17 Cl N2 O2	292.098	14559.4	13148.7	14545.6	14025.9	14101.9	10834.3	11833.1	14260.2	13406.8	13564.8	13490	13481.2	1252.6	1254.39	1186.36	1500.53	1294.59	1518.46	1145.66	1225.06	1279.22	1205.37	1257.89	1220.7	1335.76	1299.19	1300.87	1239.98	1175.19	1118.6	1222.3	1183.46	1191.48	1150.73	1168.13	1189.67
Codeine	C18 H21 N O3	299.152	94594.4	103667	69691.2	52031.4	55031.7	31068	37880.2	31021.5	36613.3	34710.8	37327	45578.5	3709.74	4246.49	3071.88	1108.66	1034.57	1815.29	1083.27	1122.45	1014.9	1040.73	1087.08	1021.34	1217.89	1309.88	1005.55	1063.48	1041.17	1000	1000	1000	1000	1000	1000	1000
Coniine	C8 H17 N	127.136	48802.1	47246	19156.9	30283.7	28339.2	22594.4	55396.3	66529.9	60178.7	47096	48441.9	31761	12474.1	13888.8	12480.6	7114.58	5636.69	6523.64	3375	4074.12	2972.66	1638.2	2895.1	2445.36	1221.79	1137.75	1159.58	1151.56	2967.12	1120.78	1436.28	2147.44	1152.49	1209.33	1070.96	3027.43
D-Panthenol	C9 H19 N O4	205.132	48545.5	54982.6	46483.1	116151	47991.8	42587.6	58044	18065.2	25684.9	38041.5	34303.2	100358	38761.3	43182.4	21898.2	19353	29719.7	36628.2	53772.1	24980.9	56616	20342.8	30651	21609.2	42465.7	25735.5	18312.9	10233.1	9142.17	20627.5	16630.3	19201.9	15892.9	31000.8	9911.67	40666
Ecgonine	C9 H15 N O3	185.105	186727	215841	182455	174483	163599	127281	201821	221072	207181	150986	161346	174833	29760.2	13317.2	12491.3	8221.6	6762.18	4880.88	11784.2	6766.87	4669.59	6652.53	6294.69	11026.4	2875.84	1564.24	1035.63	1000	1039.98	3840.1	3614.91	3875.76	1003.49	1000	1000	1280.18
Escitalopram	C20 H21 F N2 O	324.164	218016	244886	217967	214512	211606	152944	212031	221632	212008	195930	168686	162670	12009.5	13880.4	12745.9	7873.57	5909.38	5560.02	2489.01	3420.8	3277.34	1211.7	2170.37	4297.05	1000	1000	1000	1496.81	1070.14	1000	1000	1000	1000	1000	1000	1655.14
Fexofenadine	C32 H39 N O4	501.288	120260	129795	63995	65845.8	75239.3	34028.4	54947.3	40266	52096	34234	33004.5	39421.8	15165.1	18681.9	13690.5	7111.97	14648	12167.9	4343.12	4123.37	9835.04	1927.88	2254.94	7358.21	1458.83	1000	1000	1000	1000	1000	1000	1000	1000	1000	1000	1000
Furosemide	C12 H11 Cl N2 O5 S	330.008	148609	104123	124302	127718	139471	140950	119109	117396	149061	123999	166892	144960	3248.98	3086.78	3731.35	3518.49	3423.45	3147.84	3537.46	3174.72	2764.06	3472.33	3380.36	3806	2441.86	2552.79	2400.14	2849.29	2389.59	2279.11	2406.21	3066.61	2582.21	2540.99	2113.15	2554.52
Hexamethylenetetramine	C6 H12 N4	140.106	251172	455620	228355	293137	437563	336310	501310	346793	294652	607708	223614	178336	44163.2	48819.1	49909.4	59654.7	53795.8	47877.3	43300.2	45530.5	44288.6	58682.5	43391.3	48859.5	8501.06	8507.97	7294.78	8013.74	8119.8	8283.03	7734.1	8024.23	7273.36	7608.88	10300.3	7436.86
Hydrochlorothiazide	C7 H8 Cl N3 O4 S2	296.965	69886.9	77932.7	51757.1	49882.1	68328.7	58088	62545.8	73979.9	72020.6	71234.7	78536.8	62147.2	1000	1170.84	1000	1012.65	1000	1075.2	1015.63	1000	1052.31	1034.47	1000	1025.12	1164.12	1000	1005.26	1034.47	1025.39	1022.59	1078.55	1095.77	1033.4	1000	1056.41	1031.95
Irbesartan	C25 H28 N6 O	428.232	97203.6	78890.8	69995.8	72852.3	84848.2	55743.3	72588.1	74488.3	93400.1	61368.1	74357.1	67165.6	6693.82	7199.41	5536.5	4886.4	2382.92	2402.59	2466.43	2203.55	2225.47	2086.24	2165.87	2155.48	2381	2236.98	2239.88	2135.03	2023.48	1926.04	2215.44	2037.72	2099.53	2102.75	2010.64	2048.41
Kinetin	C10 H9 N5 O	215.081	130216	112010	149127	176524	159850	115066	152186	150444	144783	105645	116820	119196	16170.1	13278.5	14448.6	15902.7	14905.7	16665.2	12126	11813.8	11201.6	12051.8	12548.7	13640.4	1546.16	1229.3	1000	1274.18	1033.05	1000	1106.88	1004.53	1011.38	1148.83	1000	1142.51
Lamotrigine	C9 H7 Cl2 N5	255.008	1.42833e+06	1.36977e+06	1.16484e+06	1.25489e+06	1.30826e+06	922205	1.28528e+06	1.43721e+06	1.65223e+06	1.31017e+06	1.38326e+06	1.07437e+06	92894.2	206735	168004	234727	252170	162755	224437	209007	238104	241730	205959	265027	34219.9	3672.48	5085.41	1638.26	2649.62	2912.39	2641.2	1946.12	1838.78	4186.42	4685.2	3744.65
Lidocaine	C14 H22 N2 O	234.173	334535	325318	300595	289988	282966	205087	322173	379049	366847	295549	310784	235151	44621.3	54907.1	49463.7	40298.4	34285.3	34754.2	29754.8	30191.1	25564.1	29938.9	28519.1	31258.5	4679.16	1018.02	1207.77	1004.93	1000	1011.41	1000	1000	1001.97	1034.64	1025.94	1000
Losartan	C22 H23 Cl N6 O	422.162	101508	74569.7	84469	64225	62523.1	45593.8	44433.4	36487.5	59013.8	45899.4	59213	77560.2	8495.91	8711.74	6554.15	8192.59	10005.1	5466.23	5851.01	4192.53	4445.48	5297.43	4492.59	4857.13	1006.33	1052.48	1032.92	1000	1000	1000	1000	1000	1000	1000	1000	1000
Melamine	C3 H6 N6	126.066	302575	384040	504182	589958	386112	496439	369318	583369	455146	500954	295655	265392	109567	106272	104307	122313	92557.7	85104.4	93093.4	81681.4	64009.3	61970.7	61511.5	57085.6	65811	17047.9	15596.1	16235.9	19118	19513.7	16226.8	16677.7	14794.9	12614.7	16609.1	28696.9
Metformin	C4 H11 N5	129.101	522989	563102	677205	700010	792330	599498	702233	764742	847643	601097	564112	783933	403796	396914	360767	354786	233089	204678	171753	121067	82884.3	72124.8	46182.7	50263.8	46075.1	8869.02	7442.99	6508.34	5308.32	4650.57	3596.93	2935.78	2628.57	2958.62	2886.31	2979.15
Metoprolol	C15 H25 N O3	267.183	1.83846e+06	1.7641e+06	1.5693e+06	1.61094e+06	1.64298e+06	1.12891e+06	1.62706e+06	1.71999e+06	1.84686e+06	1.51884e+06	1.53311e+06	1.38251e+06	235692	247798	200546	86740.2	49228.2	42711.9	21103.1	24490.8	12311	8364.51	16889.6	22842.5	10973	3816.9	4050.32	3642.63	3612.46	3334.9	3520.67	3408.68	3687.31	3275.15	3421.16	3535.3
Oxazepam	C15 H11 Cl N2 O2	286.051	95165.4	94777.1	85597.4	87882	87370.7	65980.9	92873.2	114209	108037	77651.4	86152.6	70267	19544.5	18556.7	25332.3	17997.6	17521.1	17649.4	16380.9	15425.3	15845.5	13590	12974.9	14371.8	2123.04	1996.76	1942.51	1996.94	2047.23	1889.36	2026.27	1969.96	1968.06	1890.5	1965.24	2003.59
Paracetamol	C8 H9 N O2	151.063	16040.7	14860.7	13517.4	14611.7	14139.8	11389.9	14278.3	13724.7	15182.1	8681.45	10718.8	11377.1	10093.3	6449.54	7628.33	6545.07	6449.21	6911.39	6222.34	2899.19	6522.31	6371.28	3199.73	6268.78	6893.69	5797.29	5764.03	6212.25	4083.38	5425.42	5733.05	5589.4	4158.15	5474.9	5035.79	2869.96
PEG n5	C10 H22 O6	238.141	657674	320416	277284	278640	175751	30751.5	300297	143415	65389.5	127116	138944	349414	753693	102165	55987.2	112946	61505.1	61312.5	74950.7	51296.6	39525.6	53210.3	44283.3	40154.9	155130	77602.8	62957.8	79996.2	351363	40800.6	57907.5	115214	63612	99666.3	59657.4	89928.4
PEG n6	C12 H26 O7	282.168	75976.2	47528.2	24751.8	24518.7	16724.1	9451	21362.1	17269.1	14254.7	15014.8	14658.9	36075	152487	30984.3	22741.8	21109.7	20905.1	20423.4	22850.7	21324.4	24543.6	19786.4	26719.9	17185.9	150850	25289.8	18446.4	18233.3	83874.7	20728	18511.4	49046.1	31313.4	20978.4	22616.8	23299.8
PEG n8	C16 H34 O9	370.22	10766.2	5116.95	3879.9	4881.81	3766.12	2615.14	4702.96	4514.65	3030.07	3383.32	3392.11	7312.75	12662.2	12825.3	9501.04	9589.81	10438.6	9018.01	9372.03	9083.6	9798.49	9025.07	8947.36	8450.97	392838	9062.66	8102.51	10933.7	9155.25	8909.83	8531.12	9374.69	7160.06	12981.2	10624.1	8269.05
Perillartine	C10 H15 N O	165.115	58185	44017.8	123652	29603.9	35763.9	43698.2	41128.2	47497.7	47690	33934.9	44080	51499.4	9413.9	10694.8	9719.72	10180.3	9557.64	9844.41	11582.3	13333.5	10784.9	11372	11954.9	9711.04	3034.06	2053.84	1931.42	1870.65	1954.1	1907.77	1907.64	1974.12	1822.02	1971.31	1817.84	1876.14
PPG n4	C12 H26 O5	250.178	384075	362966	412241	212967	229407	127413	181456	138220	248972	236850	292739	466183	72208.3	76960.3	68312.7	56808.4	57256.9	48734	46169	47693.7	43336.5	37692.8	31907.8	34314.8	31256.4	25466.2	24806.7	28371.5	25995.7	24343.3	23870.4	28274.1	23375	26133.2	23744.9	25633.2
PPG n5	C15 H32 O6	308.22	217462	220845	219780	135101	156329	80792.2	98608.6	100496	127305	126371	170787	274087	52278.7	49716	51790.2	39785.8	37690.9	30541.6	34908.7	29629.3	23912	23449.1	24108.1	23021	21843.6	14618.6	16048.2	18976	17779	18842	16671.4	16988.3	17106.3	15340.9	19302	18619.6
Pregabalin	C8 H17 N O2	159.126	329737	326504	279762	225058	244522	155200	185528	157313	217572	189227	263945	321262	120875	117970	122022	113034	110119	115242	105678	90466.5	81296.5	78742.7	71792.2	69157.8	13877.7	1493.61	1549.44	1530.92	1626.14	6863.06	1511.67	1599.44	1539.96	1393.89	6550.35	6943.37
Propranolol	C16 H21 N O2	259.157	79352.4	81875	72162.9	75200.7	80209	57118.8	70920.3	76445.8	80390.7	70784.8	63536	54035.1	3396.06	3487.03	3569.59	1843.56	1332.02	1914.58	1889.06	1250.19	1778.64	1256.28	1250.74	1215.41	1360.38	1332.12	1349.53	1300.76	1243.74	1193.56	1257.18	1275.6	1218.47	1222.15	1198.67	1224.01
Ranitidine	C13 H22 N4 O3 S	314.141	46069.8	27535.8	35869.9	35190.9	34691.2	26170.5	28875.6	27645.7	39317.1	34179.7	38445.8	38921.1	2332.56	2081.73	2122.77	2215.81	2153.55	2169.85	2131.38	2203.63	2122.28	2093.39	2380.2	2004.19	2243.12	2091.78	2112.01	2022.58	2168.45	1928.75	1916.35	2101.63	2132.26	2050.21	1967.98	2097.15
Sitagliptin	C16 H15 F6 N5 O	407.118	103555	105572	93160.7	89241.3	96282.6	66050	86809.6	91525.5	91200.1	68810.9	76594.8	70399.3	11300.9	13928.6	12686.9	13579.4	11201	9329.44	8334.29	7558.52	5997.3	6628.7	4978.55	6792.64	1000	1000	1000	1000	1000	1000	1000	1000	1000	1000	1000	1000
Sotalol	C12 H20 N2 O3 S	272.119	13154.9	12999.3	11942	9840.87	13177.7	8702.1	12630.8	13260.8	12687.5	9814.62	11390.3	10344	1000	2377.92	2059.45	1609.66	1698.94	2760.5	1887.99	1002.19	1000	1076.59	1300.28	1845.19	1426.82	2012.84	1435.94	1692.56	1567.27	1265.83	1993.43	1158.17	2278.19	1884.75	1114.88	1036.3
Sulfapyridine	C11 H11 N3 O2 S	249.057	111753	91051.4	94578.7	97870.7	100391	107161	124629	102998	131169	108255	130952	126265	2108.43	1874.03	2118.52	2867.93	2735.32	2408.52	2440.2	1956.95	2498.31	2799.14	2484.52	3400.08	2223.19	1991.62	1944.08	1918.22	1954.94	1809.06	1815.3	1890.9	1886.07	1922.26	1719.03	1850.88
Tramadol	C16 H25 N O2	263.188	863064	889406	843549	781388	810548	564727	832784	824716	881399	730448	727174	591194	165669	175610	168199	131407	100056	93994.9	79047.5	66178.7	52778.3	44452.7	45471.3	48887.8	16017.6	3985.96	3440.59	3735.43	2350.23	2559.97	2879.67	2442.15	1977.22	2271.41	2550.59	1878.32
Triisopropanolamine	C9 H21 N O3	191.152	189458	168712	192585	223742	207877	124257	186131	169327	201388	172617	187484	217025	66958.7	28245.6	31935.7	39926	30942.4	51989.6	79105.8	53677.6	76752.5	50160.7	32669.7	57575.2	68071.5	35468.7	24167.1	37708	32364.7	19209.7	81171.8	31501.7	38100.7	25611.4	36521.9	18557
Tropine	C8 H15 N O	141.115	606078	616794	516727	587677	629406	473219	786340	776232	754581	623078	651387	465756	277204	297752	270339	234915	190549	192482	169282	169553	146223	141849	129831	130593	38497	7885.44	9573.76	2685.74	14557.4	6802.28	6947.57	4795.88	9535.06	18710.1	7325.2	5231.95
Valsartan	C24 H29 N5 O3	435.227	18861.1	17462.4	17374	15029.3	13378.1	10804.3	9728.12	7156.1	12004.3	15586.6	17650.2	25460.5	1408.18	1000	1000	1000	1000	1000	1000	1000	1000	1000	1000	1000	1000	1000	1048.12	1000	1000	1000	1000	1000	1000	1000	1000	1000
Venlafaxine	C17 H27 N O2	277.204	842633	888250	746056	819578	802597	579333	966641	969696	867060	738201	774554	680465	105918	105013	91470.9	65851	45687.1	37335.3	24948.8	21948.4	12547.4	12042.4	15656.8	18871.8	5539.23	1416.76	1397.49	1385.98	1291.75	1298.27	1254.85	1351.82	1350.61	1286.23	1298.28	1292.54
